# Supplementary material for: Giant enhancement of electronic polarizability and the first hyperpolarizability of fluoride-decorated graphene versus graphyne and graphdiyne: insights from ab initio calculations
Source: Royal Society of Chemistry journal article supplement (doi:10.1039/c9cp01118h), 2019-01-01
Supplement: c9cp01118h1.pdf [file c9cp01118h1.pdf]

*Electronic Supplementary Information*

**Giant Enhancement of Electronic Polarizability and the First  
Hyperpolarizability of Fluorides-Decorated Graphene *versus* Graphyne  
and Graphdiyne: Insights from Ab Initio Calculations**

Xiaojun Li,<sup>a,\*</sup> Jun Lu<sup>b</sup>

*<sup>a</sup>School of Science, Xi'an University of Posts and Telecommunications, Xi'an 710121,*

*Shaanxi, P. R. China; <sup>b</sup>School of Life Science and Technology, Inner Mongolia University of*

*Science and Technology, Baotou 014010, P. R. China*

**Contents:**

|                                                                                                              |    |
|--------------------------------------------------------------------------------------------------------------|----|
| - Calculation of nonlinear optical properties.....                                                           | S2 |
| - Optimized geometries of $M_3F@GE^{0/+}$ , $M_3F@GY^{0/+}$ , and $M_3F@GDY^{0/+}$ complexes, Figure S1..... | S3 |
| - Simulated optical absorption spectra of neutral $M_3F@GDY$ , Figure S2.....                                | S4 |
| - Simulated optical absorption spectra of cationic $M_3F@GDY^+$ , Figure S3.....                             | S5 |
| - References.....                                                                                            | S6 |

## Calculation of nonlinear optical properties

The energy of a system is a function of homogeneous electric field, and its Taylor expansion with respect to the field can be expressed as the following equation:<sup>[1]</sup>

$$E(F) = E^0 - \mu_i F_i - \frac{1}{2} \alpha_{ij} F_i F_j - \frac{1}{6} \beta_{ijk} F_i F_j F_k - \frac{1}{24} \gamma_{ijkl} F_i F_j F_k F_l \dots \quad (1)$$

where  $E^0$  is the system energy in the absence of an electric field,  $F_i$  is the electric field component along the  $i$  direction. The  $\mu_i$ ,  $\alpha_{ij}$ , and  $\beta_{ijk}$  terms are the dipole moment, polarizability, and the first hyperpolarizability, respectively, of which  $\beta_{ijk}$  is recognized as second-order nonlinear optical (NLO) response coefficient.<sup>[2]</sup> The mean dipole moment ( $\mu_0$ ), static polarizability ( $\alpha_0$ ), and the static first hyperpolarizability ( $\beta_{\text{tot}}$ ) are defined as follows:

$$\mu_0 = (\mu_x^2 + \mu_y^2 + \mu_z^2)^{1/2} \quad (2)$$

$$\alpha_0 = (\alpha_{xx} + \alpha_{yy} + \alpha_{zz})/3 \quad (3)$$

$$\beta_{\text{tot}} = (\beta_x^2 + \beta_y^2 + \beta_z^2)^{1/2} \quad (4)$$

$$\text{where } \beta_i = (1/3) \sum_j (\beta_{ijj} + \beta_{jji} + \beta_{jij}) \quad i, j = \{x, y, z\}$$

The linear and nonlinear optical properties of these complexes, e.g., polarizability ( $\alpha$ ) and first hyperpolarizability ( $\beta$ ), were calculated by using the long-range corrected CAM-B3LYP functional<sup>[3]</sup> with the all-electron 6-311++G(2d, 2p) basis sets, because the method has been confirmed to be much reliable for the evaluation of various species.<sup>[4]</sup>

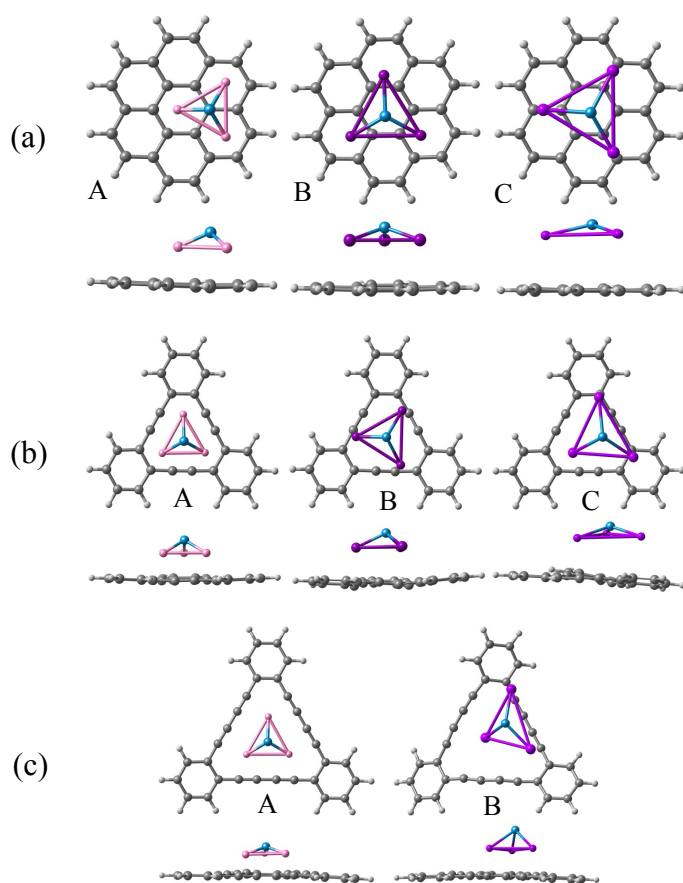

**Figure S1.** Optimized geometries of (a)  $M_3F@GE^{0/+}$ , (b)  $M_3F@GY^{0/+}$ , and (c)  $M_3F@GDY^{0/+}$  ( $M = Li, Na, \text{ and } K$ ) complexes. The top and side views are labeled.

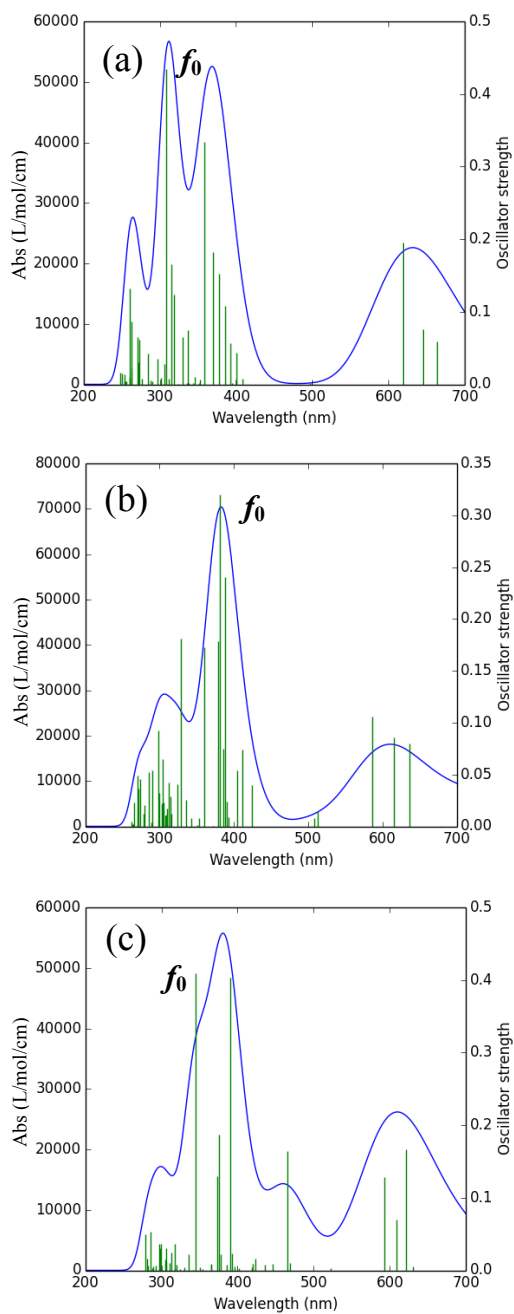

**Figure S2.** Simulated optical absorption spectra of neutral (a)  $\text{Li}_3\text{F@GDY}$ , (b)  $\text{Na}_3\text{F@GDY}$ , and (c)  $\text{K}_3\text{F@GDY}$  complexes using the CAM-B3LYP method. The oscillator strengths of them are inserted.

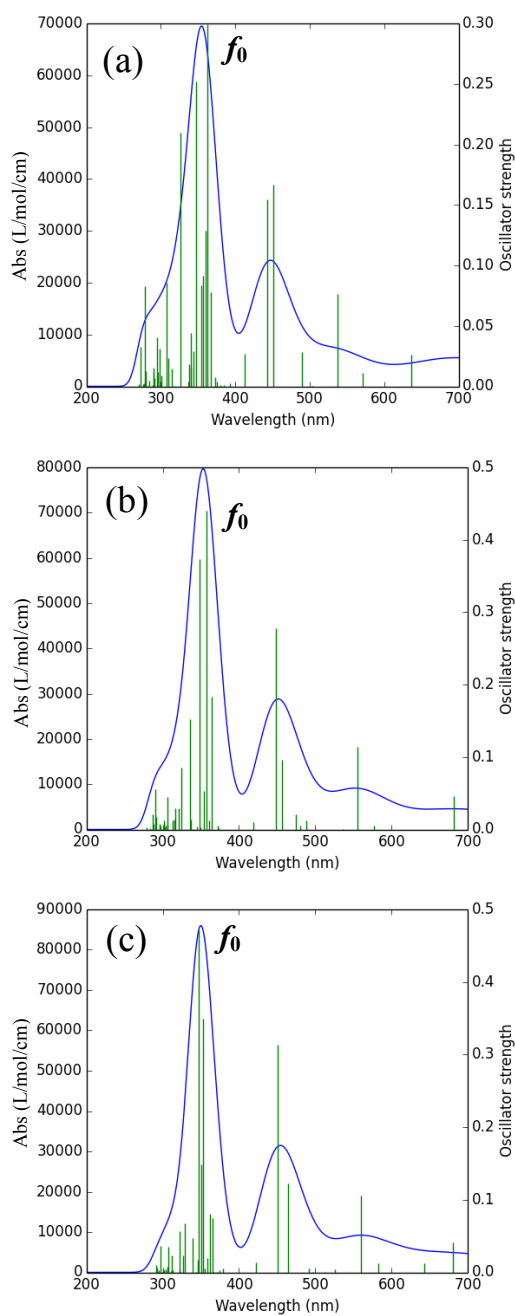

**Figure S3.** Simulated optical absorption spectra of the cationic (a)  $\text{Li}_3\text{F@GDY}^+$ , (b)  $\text{Na}_3\text{F@GDY}^+$ , and (c)  $\text{K}_3\text{F@GDY}^+$  complexes using the CAM-B3LYP method. The oscillator strengths of them are inserted.

## References

- [1] a) D. R. Kanis, M. A. Ratner, T. J. Marks, *Chem. Rev.* **1994**, *94*, 195–242; b) H. D. Cohen, C. C. J. Roothaan, *J. Chem. Phys.* **1965**, *43*, S34–S39.
- [2] A. D. Buckingham, B. J. Orr, *Q. Rev. Chem. Soc.* **1967**, *21*, 195–212.
- [3] T. Yanaia, D. P. Tew, N. C. Handy, *Chem. Phys. Lett.* **2004**, *393*, 51–57.
- [4] a) S.-I. Lu, *J. Comput. Chem.* **2011**, *32*, 730–736; b) W.-M. Sun, L.-T. Fan, Y. Li, J.-Y. Liu, D. Wu, Z.-R. Li, *Inorg. Chem.* **2014**, *53*, 6170–6178; c) X. Li, H. Ren, X. Y. J. Song, *Spectrochimica Acta Part A* **2015**, *144*, 258–265; d) L. Zhang, D. Qi, L. Zhao, C. Chen, Y. Bian, W. Li, *J. Phys. Chem. A* **2012**, *116*, 10249–10256.
